# Supplementary material
Source: PubMed Central journal article supplement (PMC3178434)

# Fig. S1

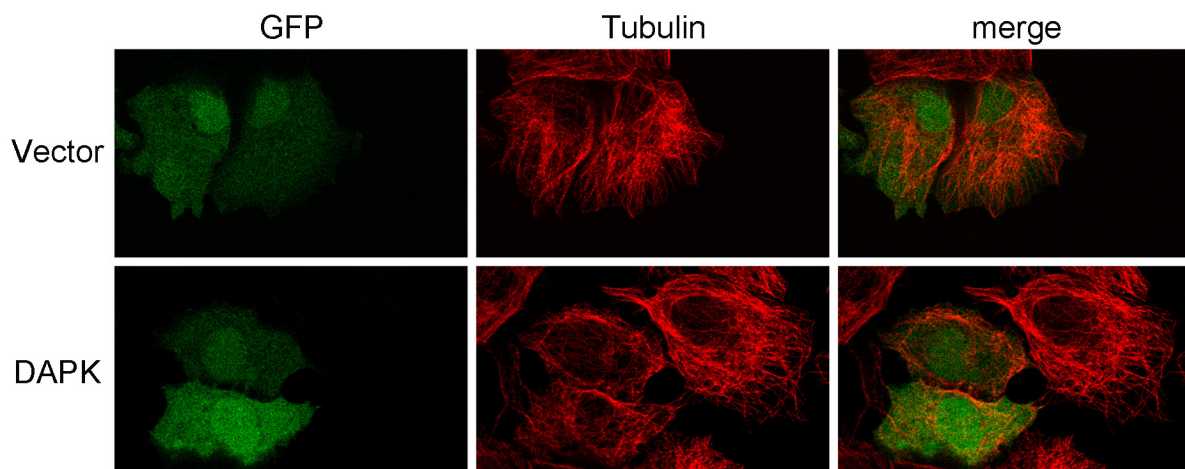

# Fig. S2

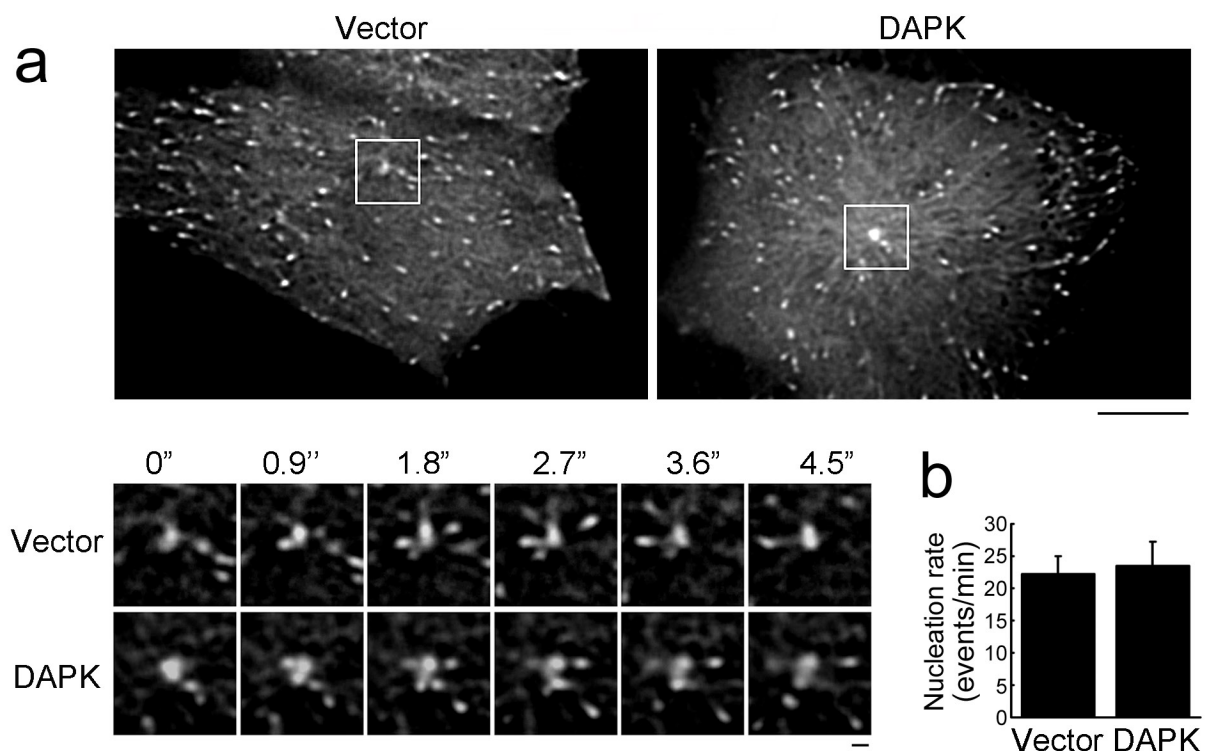

Supplement: cdd20112x1.pdf [file cdd20112x1.pdf]

# Fig. S3

a

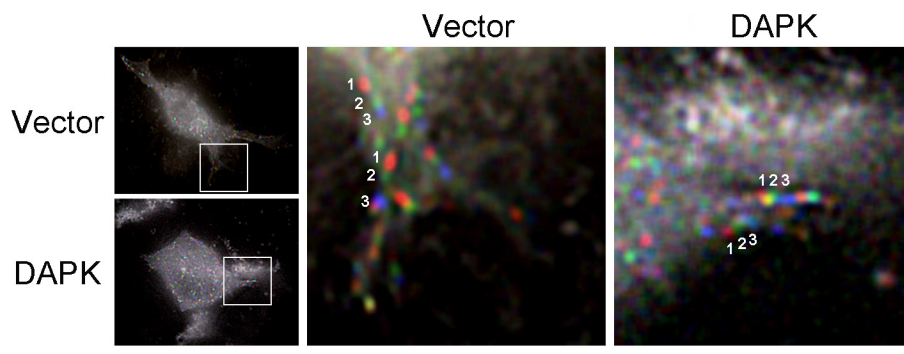

b

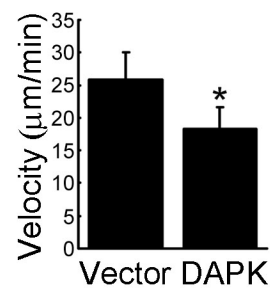

# Fig. S4

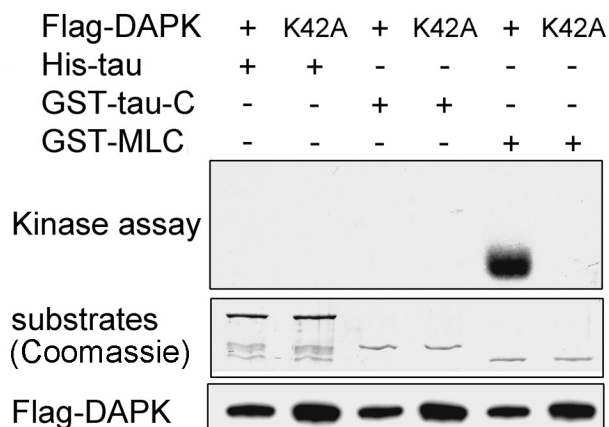

# Fig. S5

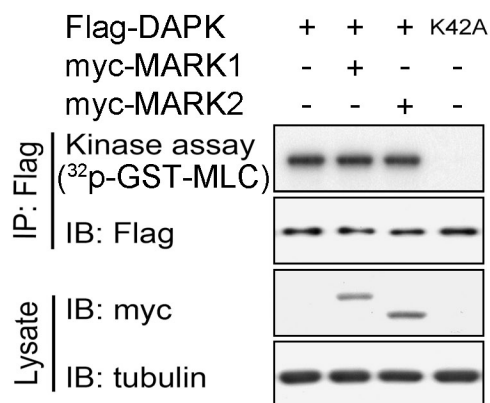

Supplement: cdd20112x2.pdf [file cdd20112x2.pdf]

# Fig. S6

## a

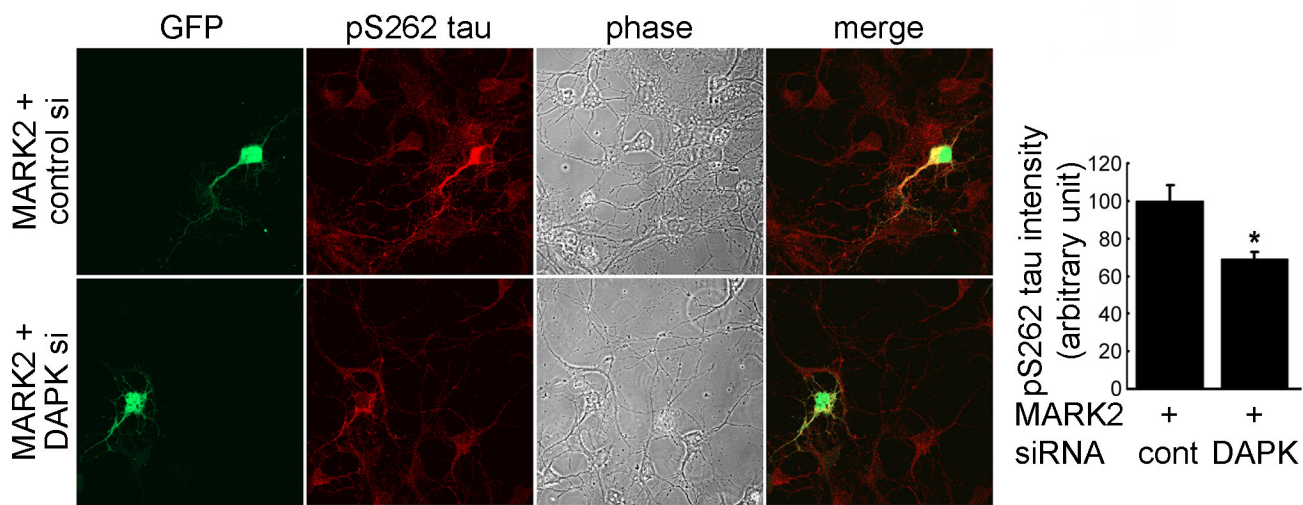

## b

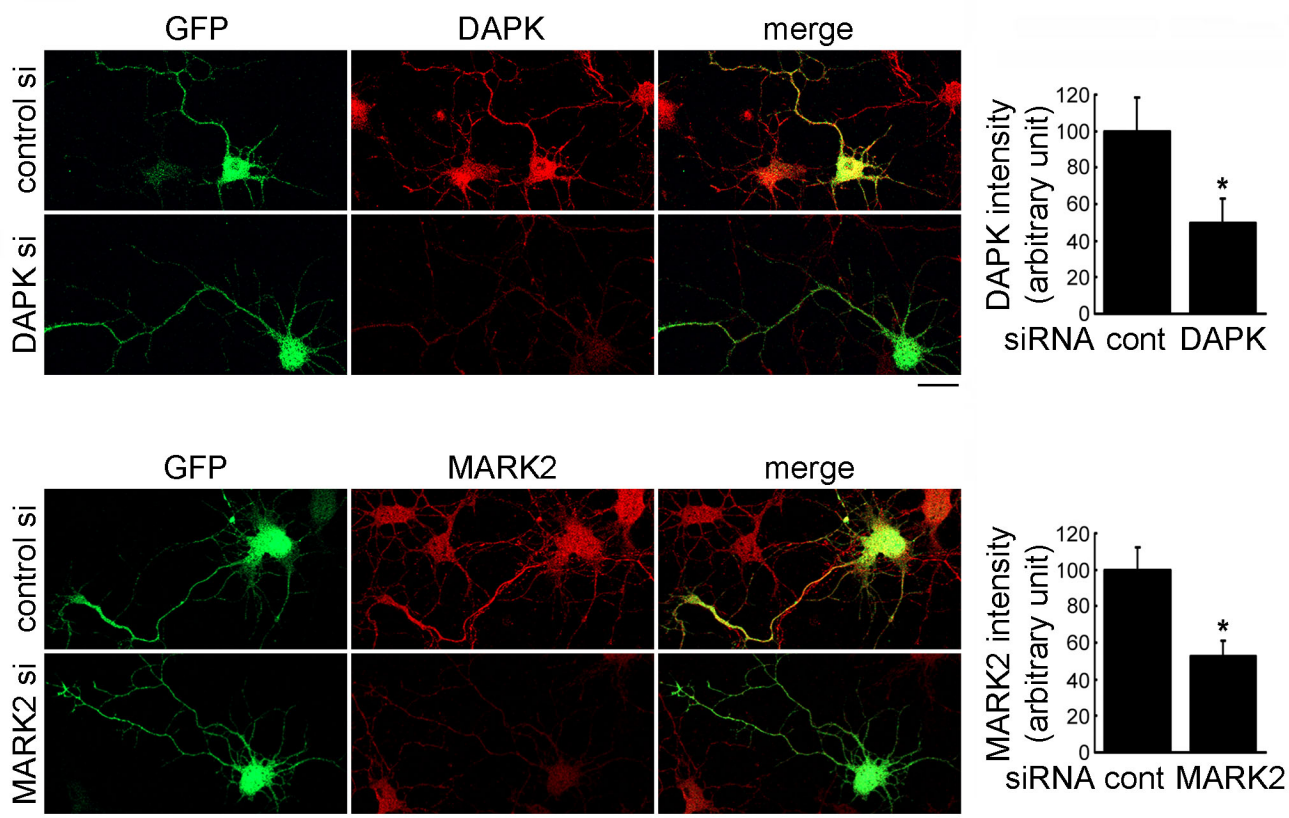

Supplement: cdd20112x3.pdf [file cdd20112x3.pdf]

# Fig. S7

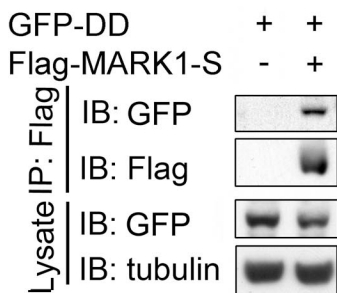

# Fig. S8

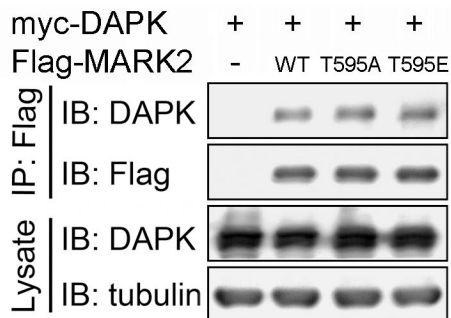

# Fig. S9

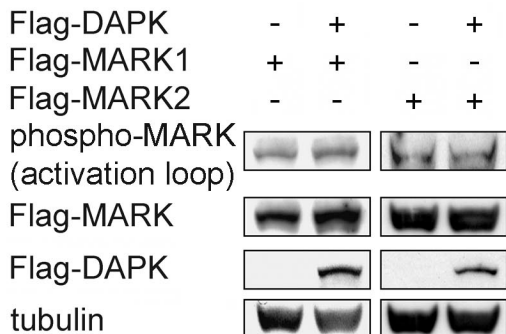

# Fig. S10

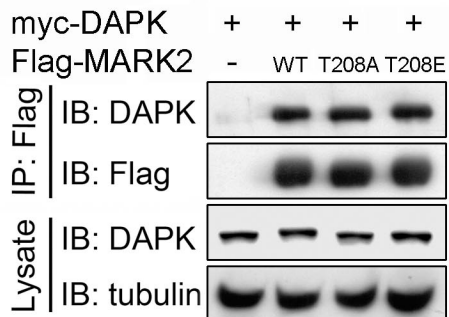

# Fig. S11

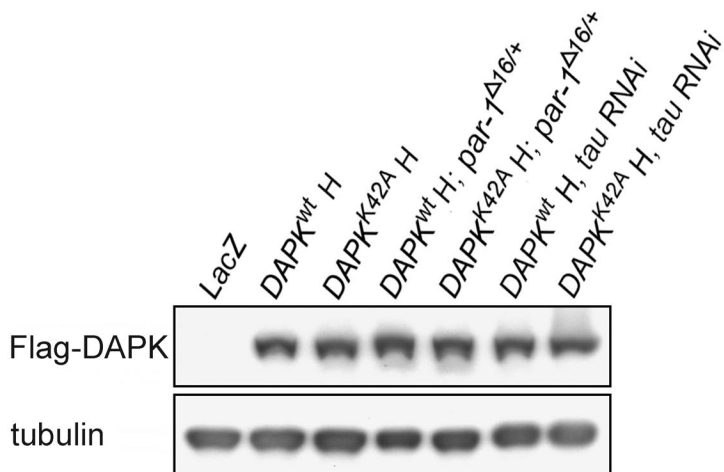

Supplement: cdd20112x4.pdf [file cdd20112x4.pdf]
